# Supplementary material for: Tunable self-assembly of nanogels into superstructures with controlled organization
Source: Royal Society of Chemistry journal article supplement (doi:10.1039/c4ra06744d), 2014-01-01
Supplement: c4ra06744d1.pdf [file c4ra06744d1.pdf]

### Supplementary information

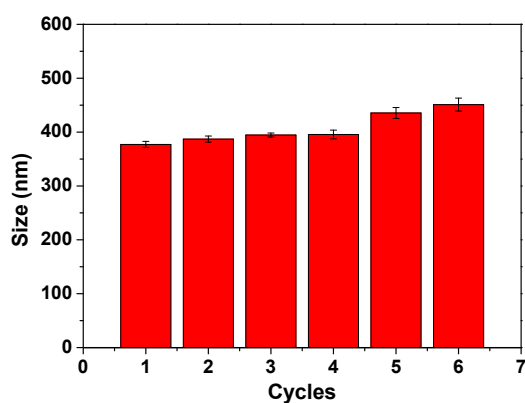

Fig.S1. Particle size of Ly/XG NPs with different switchable cycles at pH 7.0.

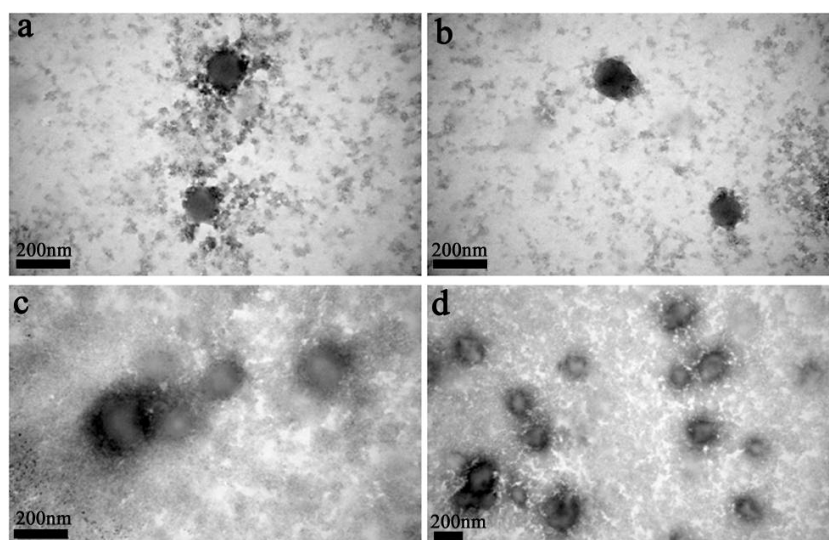

Fig.S2. Morphology of Ly/XG NPs with different switchable cycles (a cycle 1, b cycle 2, c cycle 4, d cycle 6) at pH 7.0.

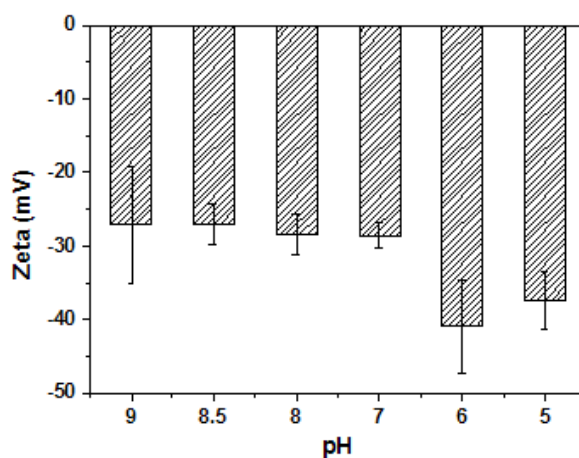

Fig.S3 Zeta potential of Ly/XG solutions at different pH conditions

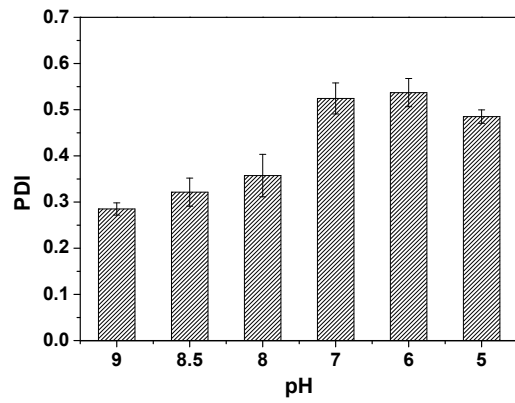

Fig.S4 The polydispersity of Ly/XG NPs at different pH conditions

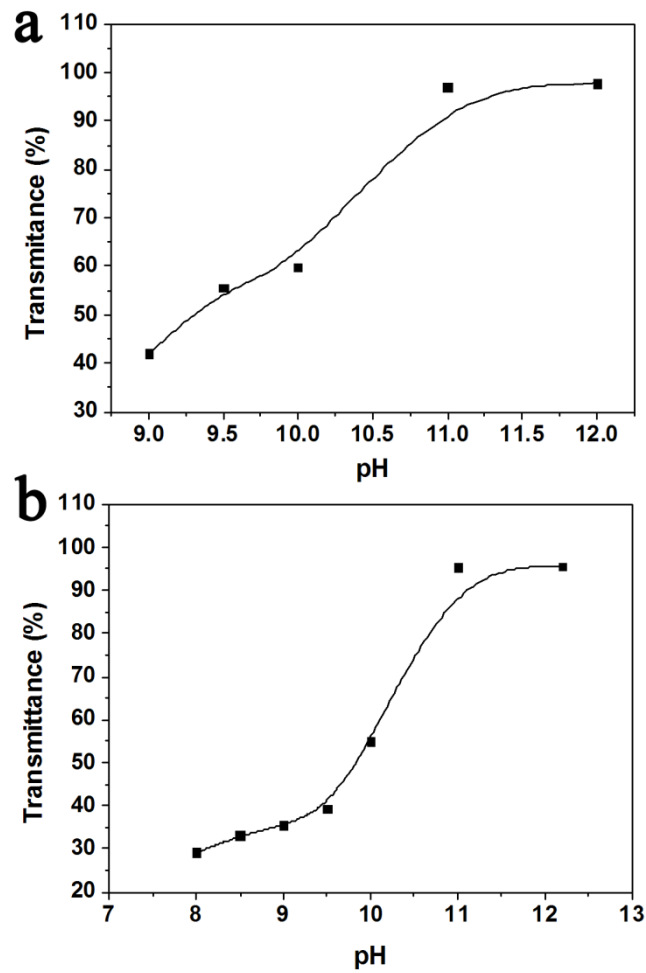

Fig.S5 Transmittance of Ly/XG solutions as the of pH of 12 (a) and 12.2 (b)

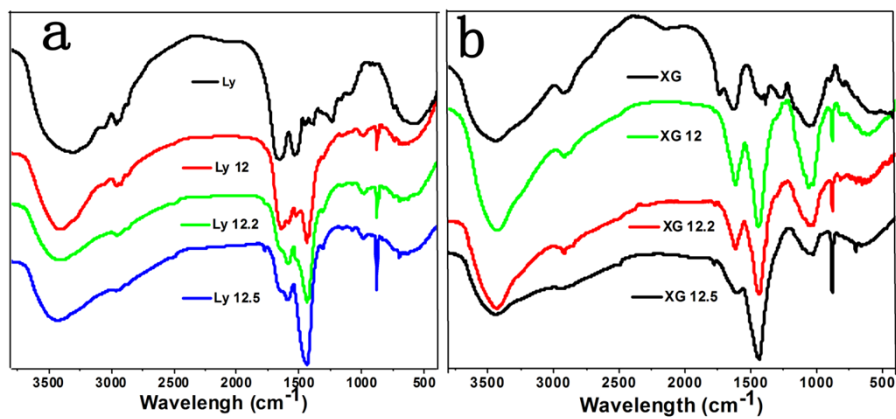

Fig.S6 FTIR of Ly (a) and XG (b) that heated at different pH as compared with undisposed samples
